# Supplementary material for: Learning Curves for Robotic-Assisted Ventral Hernia Repair
Source: PubMed Central journal article supplement (PMC11615711; doi:10.1001/jamanetworkopen.2024.48521), 2024-12-03

## Supplemental Online Content

Loh WS, Howard RA, Fry BT, et al. Learning curves for robotic-assisted ventral hernia repair. *JAMA Netw Open*. 2024;7(12):e2448521. doi:10.1001/jamanetworkopen.2024.48521

**eTable 1.** *Current Procedural Terminology (CPT) Codes and International Classification of Diseases Ninth and Tenth Edition (ICD-9 and ICD-10) Codes for Ventral Hernia*

**eTable 2.** Number of Patients by Year and Operative Approach

### **eMethods**

**eFigure.** Learning Curves Generated by the Linear Spline Approach for Robotic-Assisted Ventral Hernia Repair (4-Year Reoperation Rates for Hernia Recurrence, 2011-2017)

This supplemental material has been provided by the authors to give readers additional information about their work.

eTable 1. Current Procedural Terminology (CPT) Codes and International Classification of Diseases Ninth and Tenth Edition (ICD-9 and ICD-10) Codes for Ventral Hernia

|                               |                                                                                                                  |
|-------------------------------|------------------------------------------------------------------------------------------------------------------|
| <b>ICD-9 Diagnosis Codes</b>  | 551.1, 551.2, 551.20, 551.21, 551.29, 552.1, 552.2, 552.20, 552.21, 552.29, 553.1, 553.2, 553.20, 553.21, 553.29 |
| <b>ICD-9 Procedure Codes</b>  | 53.4, 53.41, 53.42, 53.43, 53.49, 53.5, 53.51, 53.59, 53.6, 53.61, 53.62, 53.63, 53.69                           |
| <b>ICD-10 Diagnosis Codes</b> | K42, K42.0, K42.1, K42.9, K43, K43.0, K43.1, K43.2, K43.6, K43.7, K43.9                                          |
| <b>ICD-10 Procedure Codes</b> | 0WQF0ZZ, 0WMF0ZZ, 0WQF0ZZ, 0WQF3ZZ 0WQF4ZZ, 0WQFXZZ, 0WUF07Z, 0WUF0JZ, 0WUF0KZ, 0WUF47Z, 0WUF4JZ, 0WUF4KZ        |
| <b>CPT Codes</b>              | 49560, 49561, 49585, 49587, 49652, 49653, 49654, 49655, 49570, 49572                                             |

eTable 2. Number of Patients by Year and Operative Approach

| Year of surgery | All                    | Robotic      | Laparoscopic | Open          |
|-----------------|------------------------|--------------|--------------|---------------|
|                 | Number (% within year) |              |              |               |
| • 2010          | 20,074 (100.0)         | 414 (2.1)    | 4,773 (23.8) | 14,887 (74.2) |
| • 2011          | 19,385 (100.0)         | 515 (2.7)    | 4,517 (23.3) | 14,353 (74.0) |
| • 2012          | 18,072 (100.0)         | 574 (3.2)    | 4,240 (23.5) | 13,258 (73.4) |
| • 2013          | 16,621 (100.0)         | 622 (3.7)    | 3,835 (23.1) | 12,164 (73.2) |
| • 2014          | 15,080 (100.0)         | 785 (5.2)    | 3,262 (21.6) | 11,033 (73.2) |
| • 2015          | 14,184 (100.0)         | 1,030 (7.3)  | 2,792 (19.7) | 10,362 (73.1) |
| • 2016          | 13,645 (100.0)         | 1,417 (10.4) | 2,533 (18.6) | 9,695 (71.1)  |
| • 2017          | 13,206 (100.0)         | 1,758 (13.3) | 2,186 (16.6) | 9,262 (70.1)  |
| • 2018          | 11,585 (100.0)         | 1,821 (15.7) | 1,774 (15.3) | 7,990 (69.0)  |
| • 2019          | 10,763 (100.0)         | 1,956 (18.2) | 1,517 (14.1) | 7,290 (67.7)  |
| • 2020          | 7,915 (100.0)          | 1,730 (21.9) | 942 (11.9)   | 5,243 (66.2)  |

## eMethods

We conducted a sensitivity analysis using 4-year reoperation rates for hernia recurrence, based on index surgeries from 2011 to 2017, to capture the full duration of the patient follow-up period. Surgeons needed to perform 15 robotic-assisted ventral hernia repairs to achieve outcomes equivalent to the national laparoscopic benchmark (eFigure). For the open approach, 12 robotic-assisted repairs were required to reach equivalent reoperation rates for hernia recurrence. Using this benchmark, only 7.4% of surgeons achieved lower patient reoperation rates than those with the laparoscopic approach, and 10.79% surpassed the rates of the open approach. However, this approach is limited as it may estimate artificially short learning curves due to smaller differences in reoperation rates for hernia recurrence with shorter follow-up periods.

eFigure. Learning Curves Generated by the Linear Spline Approach for Robotic-Assisted Ventral Hernia Repair (4-Year Reoperation Rates for Hernia Recurrence, 2011-2017)

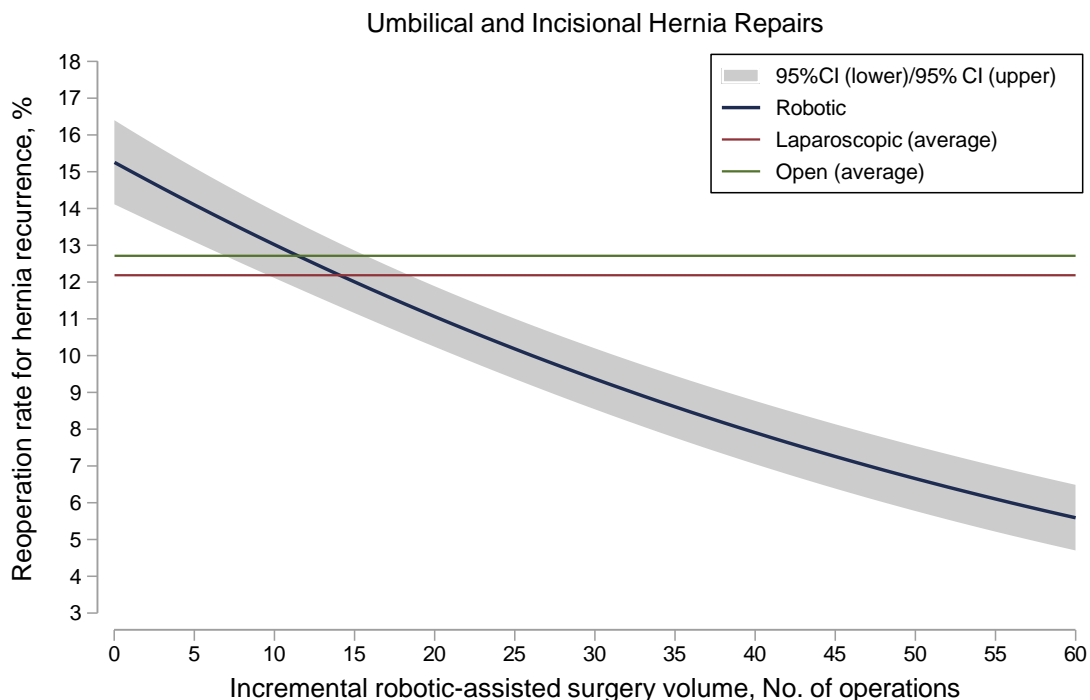

Supplement: jamanetwopen-e2448521-s001.pdf [file jamanetwopen-e2448521-s001.pdf]
