# Supplementary material for: Learning Curves for Robotic-Assisted Ventral Hernia Repair
Source: PubMed Central journal article supplement (PMC11615711; doi:10.1001/jamanetworkopen.2024.48521), 2024-12-03
Supplement: jamanetwopen-e2448521-s002.pdf [file jamanetwopen-e2448521-s002.pdf]

## Data Sharing Statement

Loh. Learning Curves for Robotic-Assisted Ventral Hernia Repair. *JAMA Netw Open*.  
Published December 03, 2024. doi:10.1001/jamanetworkopen.2024.48521

### Data

**Data available:** No
